# Supplementary material for: Environmental footprints of Mediterranean versus Western dietary patterns: beyond the health benefits of the Mediterranean diet
Source: PubMed Central journal article supplement (PMC3895675; doi:10.1186/1476-069x-12-118), 2013-12-30
Supplement: 1476-069X-12-118-S2.pdf [file 1476-069X-12-118-S2.pdf]

**Additional file 2.** Relative intakes of each food group to the MDP and relative contributions to environmental footprints.

| <b>Food group</b>     | <b>Contribution to the MDP intake</b> | <b>Relative contribution to total footprints</b> |                           |                          |                                 |
|-----------------------|---------------------------------------|--------------------------------------------------|---------------------------|--------------------------|---------------------------------|
|                       |                                       | <b>Land use</b>                                  | <b>Energy consumption</b> | <b>Water consumption</b> | <b>Greenhouse gas emissions</b> |
| Cereals               | 11%                                   | 12%                                              | 4%                        | 17%                      | 0%                              |
| Vegetables            | 41%                                   | 4%                                               | 17%                       | 34%                      | 1%                              |
| Fruit                 | 27%                                   | 11%                                              | 11%                       | 13%                      | 0%                              |
| Dairy products        | 11%                                   | 38%                                              | 41%                       | 14%                      | 55%                             |
| Vegetal oils and fats | 2%                                    | 7%                                               | 10%                       | 14%                      | 5%                              |
| Fish                  | 2%                                    | 0%                                               | 9%                        | 0%                       | 9%                              |
| Meat                  | 2%                                    | 16%                                              | 4%                        | 3%                       | 27%                             |
| Sweets & sugar        | <1%                                   | 0%                                               | 0%                        | 0%                       | 0%                              |
| Other products        | 4%                                    | 11%                                              | 4%                        | 5%                       | 2%                              |
