# Supplementary material for: Environmental footprints of Mediterranean versus Western dietary patterns: beyond the health benefits of the Mediterranean diet
Source: PubMed Central journal article supplement (PMC3895675; doi:10.1186/1476-069x-12-118), 2013-12-30
Supplement: 1476-069X-12-118-S3.pdf [file 1476-069X-12-118-S3.pdf]

**Additional file 3.** Composition of the dietary patterns considered (Kg ind<sup>-1</sup> y<sup>-1</sup>)

| <b>Food group</b>     | <b>MDP</b> | <b>SCP</b> | <b>WDP</b> |
|-----------------------|------------|------------|------------|
| Cereals               | 75         | 98         | 112        |
| Vegetables            | 269        | 160        | 49         |
| Fruit                 | 175        | 88         | 111        |
| Dairy products        | 71         | 178        | 254        |
| Vegetal oils and fats | 11         | 28         | 29         |
| Fish                  | 14         | 81         | 54         |
| Meat                  | 16         | 117        | 133        |
| Sweets & sugar        | <1%        | 26         | 68         |
| Other products (<4%)  | 25         | 111        | 83         |
